# Supplementary material for: Evolution and differential expression of a vertebrate vitellogenin gene cluster
Source: Springer Nature journal article supplement (doi:10.1186/1471-2148-9-2), 2009-01-01
Supplement: Additional file 1 [file 1471-2148-9-2-s1.pdf]

**Title:** Accession numbers of the sequences used in the analyses.

**Description:** Non-genomic variants are derived from genbank, while genomic variants for chicken, zebrafish, medaka, torafugu and spotted green pufferfish are taken from ensembl release 49.

| Animal | Species                     | Vtg                              | Accession #       |                                              |
|--------|-----------------------------|----------------------------------|-------------------|----------------------------------------------|
| 1      | Atlantic halibut            | <i>Hippoglossus hippoglossus</i> | <i>vtgAa</i>      | ABQ58113                                     |
| 2      | Atlantic halibut            | <i>Hippoglossus hippoglossus</i> | <i>vtgAb</i>      | ABQ58114                                     |
| 3      | Atlantic herring            | <i>Clupea harengus</i>           | <i>vtgAc1</i>     | FJ441000                                     |
| 4      | Atlantic herring            | <i>Clupea harengus</i>           | <i>vtgAc2</i>     | FJ441001                                     |
| 5      | Atlantic herring            | <i>Clupea harengus</i>           | <i>vtgC</i>       | FJ441002                                     |
| 6      | Barfin flounder             | <i>Verasper moseri</i>           | <i>vtgAa</i>      | AB181833                                     |
| 7      | Barfin flounder             | <i>Verasper moseri</i>           | <i>vtgAb</i>      | AB181834                                     |
| 8      | Chicken                     | <i>Gallus gallus</i>             | <i>vtgII</i>      | GGVITIIG                                     |
| 9      | Chicken                     | <i>Gallus gallus</i>             | <i>vtgIII</i>     | ENSGALP00000037938                           |
| 10     | Chicken                     | <i>Gallus gallus</i>             | <i>vtgI</i>       | D89547                                       |
| 11     | Chinese minnow              | <i>Phoxinus oxycephalus</i>      | <i>vtgAo1</i>     | EF639845                                     |
| 12     | Common carp                 | <i>Cyprinus carpio</i>           | <i>vtgAo2</i>     | AB106873                                     |
| 13     | Common carp                 | <i>Cyprinus carpio</i>           | <i>vtgAo1</i>     | AF414432                                     |
| 14     | Common mummichog            | <i>Fundulus heteroclitus</i>     | <i>vtgAa</i>      | U07055                                       |
| 15     | Common mummichog            | <i>Fundulus heteroclitus</i>     | <i>vtgAb</i>      | FHU70826                                     |
| 16     | Conger eel                  | <i>Conger myriaster</i>          | <i>vtgAe1</i>     | AB185334                                     |
| 17     | Cuckoo wrasse               | <i>Labrus mixtus</i>             | <i>vtgAa</i>      | FJ456934                                     |
| 18     | Cuckoo wrasse               | <i>Labrus mixtus</i>             | <i>vtgAb2</i>     | FJ456935                                     |
| 19     | Cuckoo wrasse               | <i>Labrus mixtus</i>             | <i>vtgC</i>       | FJ456936                                     |
| 20     | Fathead minnow              | <i>Pimephales promelas</i>       | <i>vtgAo1</i>     | AF130354                                     |
| 21     | Galaxy coral                | <i>Galaxea fascicularis</i>      | <i>vtg</i>        | AB179781                                     |
| 22     | Goldsinny wrasse            | <i>Ctenolabrus rupestris</i>     | <i>vtgAa</i>      | EU011580                                     |
| 23     | Goldsinny wrasse            | <i>Ctenolabrus rupestris</i>     | <i>vtgAb1</i>     | EU011581                                     |
| 24     | Goldsinny wrasse            | <i>Ctenolabrus rupestris</i>     | <i>vtgAb2</i>     | FJ456929                                     |
| 25     | Goldsinny wrasse            | <i>Ctenolabrus rupestris</i>     | <i>vtgC</i>       | EU011582                                     |
| 26     | Gray Mullet                 | <i>Mugil cephalus</i>            | <i>vtgAa</i>      | AB288932                                     |
| 27     | Gray Mullet                 | <i>Mugil cephalus</i>            | <i>vtgAb</i>      | AB288933                                     |
| 28     | Gray Mullet                 | <i>Mugil cephalus</i>            | <i>vtgC</i>       | AB288934                                     |
| 29     | Green spotted puffer        | <i>Tetraodon nigriviridis</i>    | <i>vtgAa</i>      | GIDT00021869001                              |
| 30     | Green spotted puffer        | <i>Tetraodon nigriviridis</i>    | <i>vtgAb</i>      | GIDT00021869001                              |
| 31     | Green spotted puffer        | <i>Tetraodon nigriviridis</i>    | <i>vtgC</i>       | GSCT00019545001                              |
| 32     | Günther's walking catfish   | <i>Clarias macrocephalus</i>     | <i>vtgAo1</i>     | EU138884                                     |
| 33     | Haddock                     | <i>Melanogrammus aeglefinus</i>  | <i>vtgAa</i>      | AF284035                                     |
| 34     | Haddock                     | <i>Melanogrammus aeglefinus</i>  | <i>vtgAb</i>      | AF284034                                     |
| 35     | Japanese eel                | <i>Anguilla japonica</i>         | <i>vtgAe1</i>     | AY775788                                     |
| 36     | Japanese eel                | <i>Anguilla japonica</i>         | <i>vtgAe2</i>     | AY423445                                     |
| 37     | Japanese eel                | <i>Anguilla japonica</i>         | <i>vtgAe3</i>     | AY423444                                     |
| 38     | Medaka                      | <i>Oryzias latipes</i>           | <i>vtgAa1</i>     | AB064320                                     |
| 39     | Medaka                      | <i>Oryzias latipes</i>           | <i>vtgAa2</i>     | ENSORLESTP00000013001-7667-12994-12967-12953 |
| 40     | Medaka                      | <i>Oryzias latipes</i>           | <i>vtgAb</i>      | AB074891                                     |
| 41     | Medaka                      | <i>Oryzias latipes</i>           | <i>vtgC</i>       | ENSORLP00000008173                           |
| 42     | Mosquitofish                | <i>Gambusia affinis</i>          | <i>vtgAa</i>      | AB181835                                     |
| 43     | Mosquitofish                | <i>Gambusia affinis</i>          | <i>vtgAb</i>      | AB181836                                     |
| 44     | Mosquitofish                | <i>Gambusia affinis</i>          | <i>vtgC</i>       | AB181837                                     |
| 45     | Rainbow trout               | <i>Oncorhynchus mykiss</i>       | <i>vtgAsa</i>     | X92804                                       |
| 46     | Red seabream                | <i>Pagrus major</i>              | <i>vtgAa</i>      | AB181838                                     |
| 47     | Red seabream                | <i>Pagrus major</i>              | <i>vtgAb</i>      | AB181839                                     |
| 48     | Red seabream                | <i>Pagrus major</i>              | <i>vtgC</i>       | AB181840                                     |
| 49     | Rock cook                   | <i>Centrolabrus exoletus</i>     | <i>vtgAa</i>      | FJ456930                                     |
| 50     | Rock cook                   | <i>Centrolabrus exoletus</i>     | <i>vtgAb1</i>     | FJ456931                                     |
| 51     | Rock cook                   | <i>Centrolabrus exoletus</i>     | <i>vtgAb2</i>     | FJ456932                                     |
| 52     | Rock cook                   | <i>Centrolabrus exoletus</i>     | <i>vtgC</i>       | FJ456933                                     |
| 53     | Silver lamprey              | <i>Ichthyomyzon unicuspis</i>    | <i>vtg</i>        | M88749                                       |
| 54     | Three-spined stickleback    | <i>Gasterosteus aculeatus</i>    | <i>vtgAa</i>      | ENSGACP00000012923                           |
| 55     | Three-spined stickleback    | <i>Gasterosteus aculeatus</i>    | <i>vtgAb</i>      | ENSGACP00000012828-12856                     |
| 56     | Three-spined stickleback    | <i>Gasterosteus aculeatus</i>    | <i>vtgC</i>       | ENSGACP00000012536                           |
| 57     | Torafugu                    | <i>Takifugu rubripes</i>         | <i>vtgAa</i>      | ENSTRUG00000017475                           |
| 58     | Torafugu                    | <i>Takifugu rubripes</i>         | <i>vtgAb</i>      | ENSTRUG00000017475                           |
| 59     | Torafugu                    | <i>Takifugu rubripes</i>         | <i>vtgC</i>       | ENSTRUP00000009572                           |
| 60     | White cloud mountain minnow | <i>Tanichthys albonubes</i>      | <i>vtgAo1</i>     | EF370398                                     |
| 61     | White perch                 | <i>Morone americana</i>          | <i>vtgAa</i>      | AAZ17415                                     |
| 62     | White perch                 | <i>Morone americana</i>          | <i>vtgAb</i>      | AAZ17416                                     |
| 63     | White perch                 | <i>Morone americana</i>          | <i>vtgC</i>       | AAZ17417                                     |
| 64     | White sturgeon              | <i>Acipenser transmontanus</i>   | <i>vtg</i>        | U00455                                       |
| 65     | Whitefish                   | <i>Coregonus lavaretus</i>       | <i>vtgAsb</i>     | AF454745                                     |
| 66     | Whitefish                   | <i>Coregonus lavaretus</i>       | <i>vtgAsb</i>     | AF454746                                     |
| 67     | Zebrafish                   | <i>Danio rerio</i>               | <i>vtg1 (Ao1)</i> | AF406784                                     |
| 68     | Zebrafish                   | <i>Danio rerio</i>               | <i>vtg4 (Ao1)</i> | ENSДАРP00000072674                           |
| 69     | Zebrafish                   | <i>Danio rerio</i>               | <i>vtg5 (Ao1)</i> | ENSДАРP00000061222                           |
| 70     | Zebrafish                   | <i>Danio rerio</i>               | <i>vtg6 (Ao1)</i> | ENSДАРP00000095999                           |
| 71     | Zebrafish                   | <i>Danio rerio</i>               | <i>vtg7 (Ao1)</i> | ENSДАРP00000072678                           |
| 72     | Zebrafish                   | <i>Danio rerio</i>               | <i>vtg8 (Ao2)</i> | ENSДАРP00000072780                           |
| 73     | Zebrafish                   | <i>Danio rerio</i>               | <i>vtg2 (Ao2)</i> | ENSДАРP00000061164                           |
| 74     | Zebrafish                   | <i>Danio rerio</i>               | <i>vtg3 (C)</i>   | AF254638                                     |
