# Supplementary material for: Evolution and differential expression of a vertebrate vitellogenin gene cluster
Source: Springer Nature journal article supplement (doi:10.1186/1471-2148-9-2), 2009-01-01
Supplement: Additional file 2 [file 1471-2148-9-2-s2.pdf]

**Title:** Gene specific primers used in the study.

**Description:** P1, P11 and P21 are designed from red seabream with accession numbers AB181838, AB181839, AB181840, for *vtgAa*, *vtgAb*, and *vtgC*, respectively. All other primers are from the Labridae in the study.

|       | primer | Sequence                              |
|-------|--------|---------------------------------------|
| vtgAa | P1     | 5'-GCAGACCAAGCAATCCTTGGTGTTCCTTGA-3'  |
|       | P2     | 5'-TGCCCTGTCGAGCTTATAAAGC-3'          |
|       | P3     | 5'-GTTGCAAGACTTGACATCAAGGAG-3'        |
|       | P4     | 5'-CTTGGCTTGGAGCATAACAG-3'            |
|       | P5     | 5'-TCAGAGCAGCAGAAAGTCCCAGTGGCAGGAA-3' |
|       | P6     | 5'-CGACAGGGCAGACAGGCAAATCGGTGCAAT-3'  |
|       | P7     | 5'-TGCACCGATTTGCCTGTCTGCCCTGTCTGA-3'  |
|       | P8     | 5'-ATCCTGCCCATCCATGGCACAGCAGCTACA-3'  |
|       | P9     | 5'-CAACGAGGGCAACTTTAAGGTC-3'          |
|       | P10    | 5'-CAGGTCGATATCAATGTCAGCAA-3'         |
| vtgAb | P11    | 5'-CATCTGGGCAGCGCCATTCAAGATGTTGA-3'   |
|       | P12    | 5'-TCACCTCTGCCCTGGCTGCTCAGCTCTTGA-3'  |
|       | P13    | 5'-TTCTTCGGACAGGAAATTGCATTTGCCAACA-3' |
|       | P14    | 5'-AGACCTTGCAGCAGCCAAATTCACACCGAT-3'  |
|       | P15    | 5'-GCATCAGCCAGAGTAGTCACCA-3'          |
|       | P16    | 5'-GCGGAGAACGACCACTATAGGA-3'          |
|       | P17    | 5'-TGCGTGGAGTGCAGGGCTAGAGGAAAGTCT-3'  |
|       | P18    | 5'-TTGAGACCAAGCTGCCAATGGGTTTGGTGA-3'  |
|       | P19    | 5'-GGGCCAGTCATTGAGAAGATTG-3'          |
|       | P20    | 5'-AACTGAGTGTTGCTGTTGCTTCTG-3'        |
| vtgC  | P21    | 5'-TGGTACTGGGTCATCCAGGTTCTGCATCAT-3'  |
|       | P22    | 5'-CAAACCAACGGCAGAGGGAGGTGTCATTACA-3' |
|       | P23    | 5'-TTCTCCCTGGAGTCTCTGCCAC-3'          |
|       | P24    | 5'-AGCCTCCTCAAAGTCTCAAGCAG-3'         |
|       | P25    | 5'-ACATCCAGATAGTGGTCGCCAA-3'          |
|       | P26    | 5'-ATGGTGCTGCTTGGGGTGACTGACACAGCT-3'  |
|       | P27    | 5'-TTCCCTGGTGAAGGACTGACAG-3'          |
|       | P28    | 5'-GTTCATAAAGGACCTAATTGCGG-3'         |
|       | P29    | 5'-GTGAAGGGCGGTAATTTCAAGATGCAAGCAA-3' |
